# Supplementary material
Source: PubMed Central journal article supplement (PMC7099467)
Supplement: jamaophthalmol-e200164-s001.pdf [file jamaophthalmol-e200164-s001.pdf]

## Supplementary Online Content

Camacci ML, Lu A, Lehman EB, Scott IU, Bowie E, Pantanelli SM. Association between sex composition and publication productivity of journal editorial and professional society board members in ophthalmology. *JAMA Ophthalmol*. Published online March 26, 2020. doi:10.1001/jamaophthalmol.2020.0164

**eTable 1.** Gender Composition of the 20 Ophthalmology Journals Studied

**eTable 2.** Gender Composition and Size of the Ophthalmology Societies Studied

This supplementary material has been provided by the authors to give readers additional information about their work.

**eTable 1.** Gender Composition of the 20 Ophthalmology Journals Studied

| <b>Name of Journal</b>                                | <b>Editorial Board</b> | <b>Women Editorial Board Members</b> | <b>Men Editorial Board Members</b> |
|-------------------------------------------------------|------------------------|--------------------------------------|------------------------------------|
| Progress in Retinal and Eye Research                  | 18                     | 1                                    | 17                                 |
| Ophthalmology                                         | 37                     | 14                                   | 23                                 |
| American Journal of Ophthalmology                     | 48                     | 8                                    | 40                                 |
| JAMA Ophthalmology                                    | 18                     | 7                                    | 11                                 |
| Retina                                                | 72                     | 14                                   | 58                                 |
| Ocular Surface                                        | 51                     | 15                                   | 36                                 |
| British Journal of Ophthalmology                      | 32                     | 6                                    | 26                                 |
| Investigative Ophthalmology and Visual Science        | 98                     | 44                                   | 54                                 |
| Journal of Refractive Surgery                         | 57                     | 12                                   | 45                                 |
| Journal of Cataract and Refractive Surgery            | 40                     | 11                                   | 29                                 |
| Acta Ophthalmologica                                  | 90                     | 27                                   | 63                                 |
| Survey of Ophthalmology                               | 25                     | 4                                    | 21                                 |
| Documenta Ophthalmologica                             | 31                     | 7                                    | 24                                 |
| Annual Review of Vision Science                       | 10                     | 4                                    | 6                                  |
| Cornea                                                | 38                     | 6                                    | 32                                 |
| Translational Vision Science and Technology           | 91                     | 13                                   | 78                                 |
| Experimental Eye Research                             | 33                     | 10                                   | 23                                 |
| Current Opinion in Ophthalmology                      | 29                     | 4                                    | 25                                 |
| Transactions of the American Ophthalmological Society | 7                      | 1                                    | 6                                  |
| Ophthalmic and Physiological Optics                   | 34                     | 12                                   | 22                                 |

**eTable 2.** Gender Composition and Size of the Ophthalmology Societies Studied

| <b>Name of Society</b>                                            | <b>All Members</b> | <b>Women Society Board Members</b> | <b>Men Society Board Members</b> |
|-------------------------------------------------------------------|--------------------|------------------------------------|----------------------------------|
| American Academy of Ophthalmology                                 | 32000 <sup>b</sup> | 8                                  | 27                               |
| American Association of Ophthalmic Oncologists and Pathologists   | 174 <sup>a</sup>   | 4                                  | 4                                |
| American Association for Pediatric Ophthalmology and Strabismus   | 1922 <sup>a</sup>  | 6                                  | 5                                |
| American Glaucoma Society                                         | 1400 <sup>a</sup>  | 3                                  | 11                               |
| American Ophthalmological Society                                 | 384 <sup>c</sup>   | 1                                  | 6                                |
| American Society of Cataract and Refractive Surgery               | 6700 <sup>a</sup>  | 2                                  | 20                               |
| American Society of Ophthalmic Plastic and Reconstructive Surgery | 750 <sup>d</sup>   | 2                                  | 7                                |
| American Society of Retina Specialists                            | 3000 <sup>e</sup>  | 3                                  | 17                               |
| Association for Research in Vision and Ophthalmology              | 12000 <sup>f</sup> | 6                                  | 9                                |
| Association of University Professors of Ophthalmology             | 537 <sup>a</sup>   | 3                                  | 8                                |
| Cornea Society                                                    | 786 <sup>g</sup>   | 5                                  | 11                               |
| Macula Society                                                    | 525 <sup>a</sup>   | 4                                  | 12                               |
| North American Neuro-Ophthalmology Society                        | 700 <sup>h</sup>   | 6                                  | 10                               |
| Retina Society                                                    | 686 <sup>a</sup>   | 1                                  | 6                                |
| American Uveitis Society                                          | 291 <sup>i</sup>   | 6                                  | 5                                |

a. Society membership size confirmed by email by direct communication with society.

b. American Academy of Ophthalmology. About the American Academy of Ophthalmology. <https://www.aao.org/about/who-we-are/overview> Published 2019. Accessed November 13, 2019.

c. American Ophthalmological Society. Membership List. <https://www.aonline.org/membership/membership-list/showall> Published 2019. Accessed November 13, 2019.

d. American Society of Ophthalmic Plastic and Reconstructive Surgery. About Us. <https://www.asopr.org/about-us/> Published 2019. Accessed November 13, 2019.

e. American Society of Retina Specialists About Us. <https://www.asrs.org/about> Published 2019. Accessed November 13, 2019.

f. Association for Research in Vision and Ophthalmology. Who We Are. <https://www.arvo.org/About/who-we-are/> Published 2019. Accessed November 13, 2019.

g. Cornea Society. Discover All That Cornea Society Membership Offers. <https://corneasociety.org/> Published 2019. Accessed November 13, 2019.

h. North American Neuro-Ophthalmology Society. Who We Are. <https://www.nanosweb.org/i4a/pages/index.cfm?pageid=1> Published 2019. Accessed November 13, 2019.

i. Unconfirmed, several attempts made to contact the American Uveitis Society.
